# Supplementary material for: Characterization of Alternatively Spliced Isoforms of MUC4 and ADAM12 Genes in a Metastatic Colorectal Cancer Cell Line Model
Source: Preprints.org preprint supplement (doi:10.20944/preprints202106.0102.v1), 2021-06-03
Supplement: Supplementary file 2 [file supplementary]

A

| Gene Name          | Cell Line | Amplicon size bp | alignment                                                   |                                                                                                                                                                                                                                                                                                                                                                                                                                                                                                                                         | Gaps                                                                      |
|--------------------|-----------|------------------|-------------------------------------------------------------|-----------------------------------------------------------------------------------------------------------------------------------------------------------------------------------------------------------------------------------------------------------------------------------------------------------------------------------------------------------------------------------------------------------------------------------------------------------------------------------------------------------------------------------------|---------------------------------------------------------------------------|
| ADAM12-All Forward | CCD841    | 198bp            | ADAM12-All - CCD841 Amplicon Forward<br>ADAM12-All Isoforms | 1                   10                   20                   30                   40                   50                   60                   70                   80                   90<br>CCATTTCCCATGGTGTTCAGCAGTTGCAGCAGGAAGGACTTGGAGACCAGCCTGGAGAAAGGAATGGGGGTGTGCCTGTTTAACTGCCC 90<br>1469 CCATTTCCCATGGTGTTCAGCAGTTGCAGCAGGAAGGACTTGGAGACCAGCCTGGAGAAAGGAATGGGGGTGTGCCTGTTTAACTGCCC 1558<br>1470           1480           1490           1500           1510           1520           1530           1540           1550   | Matrix: DNAFULL<br>Gap open penalty: 10.0<br>Gap extend penalty: 1.0      |
|                    |           |                  | ADAM12-All - CCD841 Amplicon Forward<br>ADAM12-All Isoforms | 91                   100                   110                   120                   130                   140<br>GAAATCAGGGAGTCTTTCGGGGGCCAGAAAGTGTGGGAACAGATTTGTGGA 140<br>1559 GAAATCAGGGAGTCTTTCGGGGGCCAGAAAGTGTGGGAACAGATTTGTGGA 1608<br>1560           1570           1580           1590           1600                                                                                                                                                                                                                        | Length: 140<br>Identity: 140 / 140 ( 100.00% )<br>Gaps: 0 / 140 ( 0.00% ) |
| ADAM12-All Reverse | CCD841    | 198bp            | ADAM12-All - CCD841 Amplicon Reverse<br>ADAM12-All Isoforms | 1                   10                   20                   30                   40                   50                   60                   70                   80                   90<br>GTAGCTGTCAAATGGCGGTTGAGAAAGGAGGCTGCATCATGAACGCTTCCACCGGGTACCCATTTCCCATGGTGTTCAGCAGTTGCAGCA 90<br>1432 GTAGCTGTCAAATGGCGGTTGAGAAAGGAGGCTGCATCATGAACGCTTCCACCGGGTACCCATTTCCCATGGTGTTCAGCAGTTGCAGCA 1521<br>1440           1450           1460           1470           1480           1490           1500           1510           1520 | Matrix: DNAFULL<br>Gap open penalty: 10.0<br>Gap extend penalty: 1.0      |
|                    |           |                  | ADAM12-All - CCD841 Amplicon Reverse<br>ADAM12-All Isoforms | 91                   100                   110                   120                   130                   140                   150<br>GGAAGGACTTGGAGACCAGCCTGGAGAAAGGAATGGGGGTGTGCCTG-TTAACTGCCGGAAGTCAGG 157<br>1522 GGAAGGACTTGGAGACCAGCCTGGAGAAAGGAATGGGGGTGTGCCTGTTTAACTGCCGGAAGTCAGG 1589<br>1530           1540           1550           1560           1570           1580                                                                                                                                                   | Length: 158<br>Identity: 157 / 158 ( 99.37% )<br>Gaps: 1 / 158 ( 0.63% )  |
| ADAM12-All Forward | SW480     | 198bp            | ADAM12-All - SW480 Amplicon Forward<br>ADAM12-All Isoforms  | 1                   10                   20                   30                   40                   50                   60                   70                   80<br>ACGCTT-CACCGGGTA-CCATTTCCCATGGTGTTCAGCAGTTGCAGCAGGAAGGACTTGGAGACCAGCCTGGAGAAAGGAATGGGGGTGT 88<br>1465 ACGCTT-CACCGGGTA-CCATTTCCCATGGTGTTCAGCAGTTGCAGCAGGAAGGACTTGGAGACCAGCCTGGAGAAAGGAATGGGGGTGT 1554<br>1470           1480           1490           1500           1510           1520           1530           1540           1550                      | Matrix: DNAFULL<br>Gap open penalty: 10.0<br>Gap extend penalty: 1.0      |
|                    |           |                  | ADAM12-All - SW480 Amplicon Forward<br>ADAM12-All Isoforms  | 89                   90                   100                   110                   120                   130                   140                   150<br>GCCTGTTTAACTGCCGGAAGTCAGGGAGTCTTTCGGGGGCCAGAAAGTGTGGGAACAGATTTGTGGA 155<br>1555 GCCTGTTTAACTGCCGGAAGTCAGGGAGTCTTTCGGGGGCCAGAAAGTGTGGGAACAGATTTGTGGA 1621<br>1560           1570           1580           1590           1600           1610           1620                                                                                                               | Length: 157<br>Identity: 155 / 157 ( 98.73% )<br>Gaps: 2 / 157 ( 1.27% )  |
| ADAM12-All Reverse | SW480     | 198bp            | ADAM12-All - Sw480 Amplicon Reverse<br>ADAM12-All Isoforms  | 1                   10                   20                   30                   40                   50                   60                   70                   80                   90<br>TGTAGCTGTCAAATGGCGGTTGAGAAAGGAGGCTGCATCATGAACGCTTCCACCGGGTACCCATTTCCCATGGTGTTCAGCAGTTGCAGC 90<br>1431 TGTAGCTGTCAAATGGCGGTTGAGAAAGGAGGCTGCATCATGAACGCTTCCACCGGGTACCCATTTCCCATGGTGTTCAGCAGTTGCAGC 1520<br>1440           1450           1460           1470           1480           1490           1500           1510           1520 | Matrix: DNAFULL<br>Gap open penalty: 10.0<br>Gap extend penalty: 1.0      |
|                    |           |                  | ADAM12-All - Sw480 Amplicon Reverse<br>ADAM12-All Isoforms  | 91                   100                   110                   120                   130                   140                   150                   160<br>AGGAAGGACTTGGAGACCAGCCTGGAGAAAGGAATGGGGGTGTGCCTGTTTAACTGCCGGAAGTCAGGGAG 162<br>1521 AGGAAGGACTTGGAGACCAGCCTGGAGAAAGGAATGGGGGTGTGCCTGTTTAACTGCCGGAAGTCAGGGAG 1592<br>1530           1540           1550           1560           1570           1580           1590                                                                                                      | Length: 162<br>Identity: 162 / 162 ( 100.00% )<br>Gaps: 0 / 162 ( 0.00% ) |
| ADAM12-All Forward | SW620     | 198bp            | ADAM12-All - SW620 Amplicon Forward<br>ADAM12-All Isoforms  | 1                   10                   20                   30                   40                   50                   60                   70                   80                   90<br>CACCGGTACCCATTTCCCATGGTGTTCAGCAGTTGCAGCAGGAAGGACTTGGAGACCAGCCTGGAGAAAGGAATGGGGGTGTGCCTGTT 90<br>1481 CACCGGTACCCATTTCCCATGGTGTTCAGCAGTTGCAGCAGGAAGGACTTGGAGACCAGCCTGGAGAAAGGAATGGGGGTGTGCCTGTT 1570<br>1490           1500           1510           1520           1530           1540           1550           1560           1570   | Matrix: DNAFULL<br>Gap open penalty: 10.0<br>Gap extend penalty: 1.0      |
|                    |           |                  | ADAM12-All - SW620 Amplicon Forward<br>ADAM12-All Isoforms  | 91                   100                   110                   120                   130                   140<br>TAACTGCCGGAAGTCAGGGAGTCTTTCGGGGGCCAGAAAGTGTGGGAACAGATTTGTGG 149<br>1571 TAACTGCCGGAAGTCAGGGAGTCTTTCGGGGGCCAGAAAGTGTGGGAACAGATTTGTGG 1629<br>1580           1590           1600           1610           1620                                                                                                                                                                                                        | Length: 149<br>Identity: 149 / 149 ( 100.00% )<br>Gaps: 0 / 149 ( 0.00% ) |
| ADAM12-All Reverse | SW620     | 198bp            | ADAM12-All - SW620 Amplicon Reverse<br>ADAM12-All Isoforms  | 1                   10                   20                   30                   40                   50                   60                   70                   80                   90<br>GTAGCTGTCAAATGGCGGTTGAGAAAGGAGGCTGCATCATGAACGCTTCCACCGGGTACCCATTTCCCATGGTGTTCAGCAGTTGCAGCA 90<br>1432 GTAGCTGTCAAATGGCGGTTGAGAAAGGAGGCTGCATCATGAACGCTTCCACCGGGTACCCATTTCCCATGGTGTTCAGCAGTTGCAGCA 1521<br>1440           1450           1460           1470           1480           1490           1500           1510           1520 | Matrix: DNAFULL<br>Gap open penalty: 10.0<br>Gap extend penalty: 1.0      |
|                    |           |                  | ADAM12-All - SW620 Amplicon Reverse<br>ADAM12-All Isoforms  | 91                   100                   110                   120                   130                   140                   150<br>GGAAGGACTTGGAGACCAGCCTGGAGAAAGGAATGGGGGTGTGCCTG-TTAACTGCCGGAAGTCA 155<br>1522 GGAAGGACTTGGAGACCAGCCTGGAGAAAGGAATGGGGGTGTGCCTGTTTAACTGCCGGAAGTCA 1587<br>1530           1540           1550           1560           1570           1580                                                                                                                                                       | Length: 156<br>Identity: 155 / 156 ( 99.36% )<br>Gaps: 1 / 156 ( 0.64% )  |

B

| Gene Name          | Cell Line | Amplicon size bp | alignment                                                   |                                                                                                                                                                                                                                                                                                                                   | Gaps                                                                                                                                                  |
|--------------------|-----------|------------------|-------------------------------------------------------------|-----------------------------------------------------------------------------------------------------------------------------------------------------------------------------------------------------------------------------------------------------------------------------------------------------------------------------------|-------------------------------------------------------------------------------------------------------------------------------------------------------|
| ADAM12-245 Forward | CCD841    | 205bp            | ADAM12-245 - CCD841 Amplicon Forward<br>ADAM12-245 Isoforms | <div>102030405060708090100</div> <div>1AGGAGGAAAGAGGACTCAAAAGTCTGGCCTTTCACTGAGCC</div> <div>2847AGGAGGAAAGAGGACTCAAAAGTCTGGCCTTTCACTGAGCC</div> <div>28502860287028802890290029102920293029402946</div>                                                                                                                           | Matrix: DNAFULL<br>Gap open penalty: 10.0<br>Gap extend penalty: 1.0<br><br>Length: 152<br>Identity: 151 / 152 ( 99.34% )<br>Gaps: 0 / 152 ( 0.00% )  |
|                    |           |                  | ADAM12-245 - CCD841 Amplicon Forward<br>ADAM12-245 Isoforms | <div>110120130140150</div> <div>101TCAGCCTTGGCAGCCCTGATGACTGGTCTCTGGCTGCAACTTAATGCTCTGA</div> <div>2947TCAGCCTTGGCAGCCCTGATGACTGGTCTCTGGCTGCAACTTAATGCTCTGA</div> <div>295029602970298029902998</div>                                                                                                                             |                                                                                                                                                       |
| ADAM12-245 Reverse | CCD841    | 205bp            | ADAM12-245 - CCD841 Amplicon Reverse<br>ADAM12-245 Isoforms | <div>102030405060708090100</div> <div>1CTGCTCCTGAGAGAGTAGCAGGTTACCACCTCTGGCAGGCCCCAGCCCTGCAGCAAGGAGGAAAGAGGACTCAAAAGTCTGGCCTTTCACTGAGCCTCCACA</div> <div>2793CTGCTCCTGAGAGAGTAGCAGGTTACCACCTCTGGCAGGCCCCAGCCCTGCAGCAAGGAGGAAAGAGGACTCAAAAGTCTGGCCTTTCACTGAGCCTCCACA</div> <div>28002810282028302840285028602870288028902892</div> | Matrix: DNAFULL<br>Gap open penalty: 10.0<br>Gap extend penalty: 1.0<br><br>Length: 161<br>Identity: 161 / 161 ( 100.00% )<br>Gaps: 0 / 161 ( 0.00% ) |
|                    |           |                  | ADAM12-245 - CCD841 Amplicon Reverse<br>ADAM12-245 Isoforms | <div>110120130140150160</div> <div>101GCAGTGGGGGAGAAAGCAAGGGTTGGGCCCAAGTGTCCTTTCCCAAGTGACACCTCAGCCT</div> <div>2893GCAGTGGGGGAGAAAGCAAGGGTTGGGCCCAAGTGTCCTTTCCCAAGTGACACCTCAGCCT</div> <div>2900291029202930294029502953</div>                                                                                                    |                                                                                                                                                       |
| ADAM12-245 Forward | SW480     | 205bp            | ADAM12-245 - SW480 Amplicon Forward<br>ADAM12-245 Isoforms  | <div>102030405060708090100</div> <div>1CCAGCCCTGCAGCAAGGAGGAAGAGGACTCAAAAGTCTGGCCTTTCACTGAGCCTCCACAGCAGTGGGGGAGAAAGCAAGGGTTGGGCCCAAGTGTCCTTT</div> <div>2833CCAGCCCTGCAGCAAGGAGGAAGAGGACTCAAAAGTCTGGCCTTTCACTGAGCCTCCACAGCAGTGGGGGAGAAAGCAAGGGTTGGGCCCAAGTGTCCTTT</div> <div>28402850286028702880289029002910292029302932</div>   | Matrix: DNAFULL<br>Gap open penalty: 10.0<br>Gap extend penalty: 1.0<br><br>Length: 166<br>Identity: 166 / 166 ( 100.00% )<br>Gaps: 0 / 166 ( 0.00% ) |
|                    |           |                  | ADAM12-245 - SW480 Amplicon Forward<br>ADAM12-245 Isoforms  | <div>110120130140150160</div> <div>101TCCCCAGTGACACCTCAGCCTTGGCAGCCCTGATGACTGGTCTCTGGCTGCAACTTAATGCTCTGA</div> <div>2933TCCCCAGTGACACCTCAGCCTTGGCAGCCCTGATGACTGGTCTCTGGCTGCAACTTAATGCTCTGA</div> <div>2940295029602970298029902998</div>                                                                                          |                                                                                                                                                       |
| ADAM12-245 Reverse | SW480     | 205bp            | ADAM12-245 - SW480 Amplicon Reverse<br>ADAM12-245 Isoforms  | <div>102030405060708090100</div> <div>1CTGCTCCTGAGAGAGTAGCAGGTTACCACCTCTGGCAGGCCCCAGCCCTGCAGCAAGGAGGAAGAGGACTCAAAAGTCTGGCCTTTCACTGAGCCTCCACA</div> <div>2793CTGCTCCTGAGAGAGTAGCAGGTTACCACCTCTGGCAGGCCCCAGCCCTGCAGCAAGGAGGAAGAGGACTCAAAAGTCTGGCCTTTCACTGAGCCTCCACA</div> <div>28002810282028302840285028602870288028902892</div>   | Matrix: DNAFULL<br>Gap open penalty: 10.0<br>Gap extend penalty: 1.0<br><br>Length: 160<br>Identity: 160 / 160 ( 100.00% )<br>Gaps: 0 / 160 ( 0.00% ) |
|                    |           |                  | ADAM12-245 - SW480 Amplicon Reverse<br>ADAM12-245 Isoforms  | <div>110120130140150160</div> <div>101AAGAGGACTCAAAAGTCTGGCCTTTCACTGAGCCTCCACAGCAGTGGGGGAGAAAGCAAGG</div> <div>2893AAGAGGACTCAAAAGTCTGGCCTTTCACTGAGCCTCCACAGCAGTGGGGGAGAAAGCAAGG</div> <div>2900291029202930294029502952</div>                                                                                                    |                                                                                                                                                       |
| ADAM12-245 Forward | SW620     | 205bp            | ADAM12-245 - SW620 Amplicon Forward<br>ADAM12-245 Isoforms  | <div>102030405060708090</div> <div>1CCAGCCCTGCAGC-AGGAGGAAGAGGACTCAAAAGTCTGGCCTTTCACTGAGCCTCCACAGCAGTGGGGGAGAAAGCAAGGGTTGGGCCCAAGTGTCCTTT</div> <div>2833CCAGCCCTGCAGCAAGGAGGAAGAGGACTCAAAAGTCTGGCCTTTCACTGAGCCTCCACAGCAGTGGGGGAGAAAGCAAGGGTTGGGCCCAAGTGTCCTTT</div> <div>28402850286028702880289029002910292029302932</div>      | Matrix: DNAFULL<br>Gap open penalty: 10.0<br>Gap extend penalty: 1.0<br><br>Length: 166<br>Identity: 165 / 166 ( 99.40% )<br>Gaps: 1 / 166 ( 0.60% )  |
|                    |           |                  | ADAM12-245 - SW620 Amplicon Forward<br>ADAM12-245 Isoforms  | <div>100110120130140150160</div> <div>100TCCCCAGTGACACCTCAGCCTTGGCAGCCCTGATGACTGGTCTCTGGCTGCAACTTAATGCTCTGA</div> <div>2933TCCCCAGTGACACCTCAGCCTTGGCAGCCCTGATGACTGGTCTCTGGCTGCAACTTAATGCTCTGA</div> <div>2940295029602970298029902998</div>                                                                                       |                                                                                                                                                       |
| ADAM12-245 Reverse | SW620     | 205bp            | ADAM12-245 - SW620 Amplicon Reverse<br>ADAM12-245 Isoforms  | <div>102030405060708090100</div> <div>1CTGCTCCTGAGAGAGTAGCAGGTTACCACCTCTGGCAGGCCCCAGCCCTGCAGCAAGGAGGAAGAGGACTCAAAAGTCTGGCCTTTCACTGAGCCTCCACA</div> <div>2793CTGCTCCTGAGAGAGTAGCAGGTTACCACCTCTGGCAGGCCCCAGCCCTGCAGCAAGGAGGAAGAGGACTCAAAAGTCTGGCCTTTCACTGAGCCTCCACA</div> <div>28002810282028302840285028602870288028902892</div>   | Matrix: DNAFULL<br>Gap open penalty: 10.0<br>Gap extend penalty: 1.0<br><br>Length: 160<br>Identity: 160 / 160 ( 100.00% )<br>Gaps: 0 / 160 ( 0.00% ) |
|                    |           |                  | ADAM12-245 - SW620 Amplicon Reverse<br>ADAM12-245 Isoforms  | <div>110120130140150160</div> <div>101GCAGTGGGGGAGAAAGCAAGGGTTGGGCCCAAGTGTCCTTTCCCAAGTGACACCTCAGCC</div> <div>2893GCAGTGGGGGAGAAAGCAAGGGTTGGGCCCAAGTGTCCTTTCCCAAGTGACACCTCAGCC</div> <div>2900291029202930294029502952</div>                                                                                                      |                                                                                                                                                       |

C

| Gene Name         | Cell Line | Amplicon size bp | alignment                                                 |                                                                                                                                                                                                                                                                                                                                                                                                                                | Gaps                                                                      |
|-------------------|-----------|------------------|-----------------------------------------------------------|--------------------------------------------------------------------------------------------------------------------------------------------------------------------------------------------------------------------------------------------------------------------------------------------------------------------------------------------------------------------------------------------------------------------------------|---------------------------------------------------------------------------|
| ADAM12-13 Forward | CCD841    | 197bp            | ADAM12-13 - CCD841 Amplicon Forward<br>ADAM12-13 Isoforms | <pre> 10      20      30      40      50      60      70      80      90      100 1  AATGTAAGCCATGCTGGAAAAATAACTGCTGAGATACATACAGAATTACTGTAAC TGATTACACTTGGTAATTGTACTAAAGCCAAACATATATATAC 100 4855 AATGTAAGCCATGCTGGAAAAATAACTGCTGAGATACATACAGAATTACTGTAAC TGATTACACTTGGTAATTGTACTAAAGCCAAACATATATATAC 4954       4860      4870      4880      4890      4900      4910      4920      4930      4940      4950 </pre>         | Matrix: DNAFULL<br>Gap open penalty: 10.0<br>Gap extend penalty: 1.0      |
|                   |           |                  | ADAM12-13 - CCD841 Amplicon Forward<br>ADAM12-13 Isoforms | <pre>       110      120      130      140 101 TATTA AAAAGGTTTACAGAATTTTATGGTGCATTACGTGGGCATTG 146 4955 TATTA AAAAGGTTTACAGAATTTTATGGTGCATTACGTGGGCATTG 5000       4960      4970      4980      4990      5000 </pre>                                                                                                                                                                                                         | Length: 146<br>Identity: 146 / 146 ( 100.00% )<br>Gaps: 0 / 146 ( 0.00% ) |
| ADAM12-13 Reverse | CCD841    | 197bp            | ADAM12-13 - CCD841 Amplicon Reverse<br>ADAM12-13 Isoforms | <pre>       10      20      30      40      50      60      70      80      90      100 1  TCCAAC TCGTATAGCATGCATCTGTTTATTCTATAGTTATTAAGTTCTTTAAAA TGTAAGCCATGCTGGAAAAATAACTGCTGAGATACATACAGAAT 100 4803 TCCAAC TCGTATAGCATGCATCTGTTTATTCTATAGTTATTAAGTTCTTTAAAA TGTAAGCCATGCTGGAAAAATAACTGCTGAGATACATACAGAAT 4902       4810      4820      4830      4840      4850      4860      4870      4880      4890      4900 </pre> | Matrix: DNAFULL<br>Gap open penalty: 10.0<br>Gap extend penalty: 1.0      |
|                   |           |                  | ADAM12-13 - CCD841 Amplicon Reverse<br>ADAM12-13 Isoforms | <pre>       110      120      130      140      150      160 101 TACTGTAACTGATTACACTTGGTAATTGTACTAAAGCCAAACATATATATACTAT AAAAAAGGTT 165 4903 TACTGTAACTGATTACACTTGGTAATTGTACTAAAGCCAAACATATATATACTAT AAAAAAGGTT 4967       4910      4920      4930      4940      4950      4960 </pre>                                                                                                                                       | Length: 165<br>Identity: 164 / 165 ( 99.39% )<br>Gaps: 0 / 165 ( 0.00% )  |
| ADAM12-13 Forward | SW480     | 197bp            | ADAM12-13 - SW480 Amplicon Forward<br>ADAM12-13 Isoforms  | <pre>       10      20      30      40      50      60      70      80      90      100 1  AAATGTAAGCCATGCTGGAAAAATAACTGCTGAGATACATACAGAATTACTGTAAC TGATTACACTTGGTAATTGTACTAAAGCCAAACATATATATA 100 4854 AAATGTAAGCCATGCTGGAAAAATAACTGCTGAGATACATACAGAATTACTGTAAC TGATTACACTTGGTAATTGTACTAAAGCCAAACATATATATA 4953       4860      4870      4880      4890      4900      4910      4920      4930      4940      4950 </pre>   | Matrix: DNAFULL<br>Gap open penalty: 10.0<br>Gap extend penalty: 1.0      |
|                   |           |                  | ADAM12-13 - SW480 Amplicon Forward<br>ADAM12-13 Isoforms  | <pre>       110      120      130      140 101 CTATTA AAAAGGTTTACAGAATTTTATGGTGCATTACGTGGGCATTG 147 4954 CTATTA AAAAGGTTTACAGAATTTTATGGTGCATTACGTGGGCATTG 5000       4960      4970      4980      4990      5000 </pre>                                                                                                                                                                                                       | Length: 147<br>Identity: 147 / 147 ( 100.00% )<br>Gaps: 0 / 147 ( 0.00% ) |
| ADAM12-13 Reverse | SW480     | 197bp            | ADAM12-13 - SW480 Amplicon Reverse<br>ADAM12-13 Isoforms  | <pre>       10      20      30      40      50      60      70      80      90      100 1  TCCAAC TCGTATAGCATGCATCTGTTTATTCTATAGTTATTAAGTTCTTTAAAA TGTAAGCCATGCTGGAAAAATAACTGCTGAGATACATACAGAAT 100 4803 TCCAAC TCGTATAGCATGCATCTGTTTATTCTATAGTTATTAAGTTCTTTAAAA TGTAAGCCATGCTGGAAAAATAACTGCTGAGATACATACAGAAT 4902       4810      4820      4830      4840      4850      4860      4870      4880      4890      4900 </pre> | Matrix: DNAFULL<br>Gap open penalty: 10.0<br>Gap extend penalty: 1.0      |
|                   |           |                  | ADAM12-13 - SW480 Amplicon Reverse<br>ADAM12-13 Isoforms  | <pre>       110      120      130      140      150 101 TACTGTAACTGATTACACTTGGTAATTGTACTAAAGCCAAACATATATATACT 153 4903 TACTGTAACTGATTACACTTGGTAATTGTACTAAAGCCAAACATATATATACT 4955       4910      4920      4930      4940      4950 </pre>                                                                                                                                                                                    | Length: 153<br>Identity: 153 / 153 ( 100.00% )<br>Gaps: 0 / 153 ( 0.00% ) |
| ADAM12-13 Forward | SW620     | 197bp            | ADAM12-13 - SW620 Amplicon Forward<br>ADAM12-13 Isoforms  | <pre>       10      20      30      40      50      60      70      80      90      100 1  AATGTAAGCCATGCTGGAAAAATAACTGCTGAGATACATACAGAATTACTGTAAC TGATTACACTTGGTAATTGTACTAAAGCCAAACATATATATAC 100 4855 AATGTAAGCCATGCTGGAAAAATAACTGCTGAGATACATACAGAATTACTGTAAC TGATTACACTTGGTAATTGTACTAAAGCCAAACATATATATAC 4954       4860      4870      4880      4890      4900      4910      4920      4930      4940      4950 </pre>   | Matrix: DNAFULL<br>Gap open penalty: 10.0<br>Gap extend penalty: 1.0      |
|                   |           |                  | ADAM12-13 - SW620 Amplicon Forward<br>ADAM12-13 Isoforms  | <pre>       110      120      130      140 101 TATTA AAAAGGTTTACAGAATTTTATGGTGCATTACGTGGGCATT 145 4955 TATTA AAAAGGTTTACAGAATTTTATGGTGCATTACGTGGGCATT 4999       4960      4970      4980      4990 </pre>                                                                                                                                                                                                                     | Length: 145<br>Identity: 145 / 145 ( 100.00% )<br>Gaps: 0 / 145 ( 0.00% ) |
| ADAM12-13 Reverse | SW620     | 197bp            | ADAM12-13 - SW620 Amplicon Reverse<br>ADAM12-13 Isoforms  | <pre>       10      20      30      40      50      60      70      80      90      100 1  TCCAAC TCGTATAGCATGCATCTGTTTATTCTATAGTTATTAAGTTCTTTAAAA TGTAAGCCATGCTGGAAAAATAACTGCTGAGATACATACAGAAT 100 4803 TCCAAC TCGTATAGCATGCATCTGTTTATTCTATAGTTATTAAGTTCTTTAAAA TGTAAGCCATGCTGGAAAAATAACTGCTGAGATACATACAGAAT 4902       4810      4820      4830      4840      4850      4860      4870      4880      4890      4900 </pre> | Matrix: DNAFULL<br>Gap open penalty: 10.0<br>Gap extend penalty: 1.0      |
|                   |           |                  | ADAM12-13 - SW620 Amplicon Reverse<br>ADAM12-13 Isoforms  | <pre>       110      120      130      140      150 101 TACTGTAACTGATTACACTTGGTAATTGTACTAAAGCCAAACATATATATACTAT 155 4903 TACTGTAACTGATTACACTTGGTAATTGTACTAAAGCCAAACATATATATACTAT 4957       4910      4920      4930      4940      4950 </pre>                                                                                                                                                                                | Length: 155<br>Identity: 155 / 155 ( 100.00% )<br>Gaps: 0 / 155 ( 0.00% ) |
