# Supplementary material for: Characterization of Alternatively Spliced Isoforms of MUC4 and ADAM12 Genes in a Metastatic Colorectal Cancer Cell Line Model
Source: Preprints.org preprint supplement (doi:10.20944/preprints202106.0102.v1), 2021-06-03
Supplement: Supplementary file 3 [file supplementary]

A

| Gene Name      | Cell Line | Amplicon size bp | alignment                                          | Gaps                                                                                                                                                                     |
|----------------|-----------|------------------|----------------------------------------------------|--------------------------------------------------------------------------------------------------------------------------------------------------------------------------|
| MUC4-6 Forward | CCD841    | 180bp            | MUC4-6 - CCD841 Amplicon Forward<br>MUC4-6 Isoform | <div>Matrix: DNAFULL<br/>Gap open penalty: 10.0<br/>Gap extend penalty: 1.0</div> <div>Length: 242<br/>Identity: 227 / 242 ( 93.80% )<br/>Gaps: 0 / 242 ( 0.00% )</div>  |
|                |           |                  | MUC4-6 - CCD841 Amplicon Forward<br>MUC4-6 Isoform |                                                                                                                                                                          |
|                |           |                  | MUC4-6 - CCD841 Amplicon Forward<br>MUC4-6 Isoform |                                                                                                                                                                          |
| MUC4-6 Forward | CCD841    | 320bp            | MUC4-6 - CCD841 Amplicon Forward<br>MUC4-6 Isoform | <div>Matrix: DNAFULL<br/>Gap open penalty: 10.0<br/>Gap extend penalty: 1.0</div> <div>Length: 269<br/>Identity: 256 / 269 ( 95.17 % )<br/>Gaps: 0 / 269 ( 0.00% )</div> |
|                |           |                  | MUC4-6 - CCD841 Amplicon Forward<br>MUC4-6 Isoform |                                                                                                                                                                          |
|                |           |                  | MUC4-6 - CCD841 Amplicon Forward<br>MUC4-6 Isoform |                                                                                                                                                                          |
| MUC4-6 Forward | SW480     | 180bp            | MUC4-6 - SW480 Amplicon Forward<br>MUC4-6 Isoform  | <div>Matrix: DNAFULL<br/>Gap open penalty: 10.0<br/>Gap extend penalty: 1.0</div> <div>Length: 145<br/>Identity: 143 / 145 ( 98.62% )<br/>Gaps: 1 / 145 ( 0.69% )</div>  |
|                |           |                  | MUC4-6 - SW480 Amplicon Forward<br>MUC4-6 Isoform  |                                                                                                                                                                          |
|                |           |                  | MUC4-6 - SW480 Amplicon Forward<br>MUC4-6 Isoform  |                                                                                                                                                                          |
| MUC4-6 Forward | SW480     | 320bp            | MUC4-6 - SW480 Amplicon Forward<br>MUC4-6 Isoform  | <div>Matrix: DNAFULL<br/>Gap open penalty: 10.0<br/>Gap extend penalty: 1.0</div> <div>Length: 245<br/>Identity: 195 / 245 ( 79.59% )<br/>Gaps: 18 / 245 ( 7.35% )</div> |
|                |           |                  | MUC4-6 - SW480 Amplicon Forward<br>MUC4-6 Isoform  |                                                                                                                                                                          |
|                |           |                  | MUC4-6 - SW480 Amplicon Forward<br>MUC4-6 Isoform  |                                                                                                                                                                          |
| MUC4-6 Forward | SW620     | 180bp            | MUC4-6 - SW620 Amplicon Forward<br>MUC4-6 Isoform  | <div>Matrix: DNAFULL<br/>Gap open penalty: 10.0<br/>Gap extend penalty: 1.0</div> <div>Length: 228<br/>Identity: 208 / 228 ( 92.04% )<br/>Gaps: 2 / 228 ( 0.88% )</div>  |
|                |           |                  | MUC4-6 - SW620 Amplicon Forward<br>MUC4-6 Isoform  |                                                                                                                                                                          |
|                |           |                  | MUC4-6 - SW620 Amplicon Forward<br>MUC4-6 Isoform  |                                                                                                                                                                          |
| MUC4-6 Reverse | SW620     | 180bp            | MUC4-6 - SW620 Amplicon Reverse<br>MUC4-6 Isoform  | <div>Matrix: DNAFULL<br/>Gap open penalty: 10.0<br/>Gap extend penalty: 1.0</div> <div>Length: 144<br/>Identity: 139 / 144 ( 96.53% )<br/>Gaps: 0 / 144 ( 0.00% )</div>  |
|                |           |                  | MUC4-6 - SW620 Amplicon Reverse<br>MUC4-6 Isoform  |                                                                                                                                                                          |
|                |           |                  | MUC4-6 - SW620 Amplicon Reverse<br>MUC4-6 Isoform  |                                                                                                                                                                          |
| MUC4-6 Forward | SW620     | 320bp            | MUC4-6 - SW620 Amplicon Forward<br>MUC4-6 Isoform  | <div>Matrix: DNAFULL<br/>Gap open penalty: 10.0<br/>Gap extend penalty: 1.0</div> <div>Length: 123<br/>Identity: 121 / 123 ( 98.37% )<br/>Gaps: 0 / 123 ( 0.00% )</div>  |
|                |           |                  | MUC4-6 - SW620 Amplicon Forward<br>MUC4-6 Isoform  |                                                                                                                                                                          |
|                |           |                  | MUC4-6 - SW620 Amplicon Forward<br>MUC4-6 Isoform  |                                                                                                                                                                          |
| MUC4-6 Reverse | SW620     | 320bp            | MUC4-6 - SW620 Amplicon Reverse<br>MUC4-6 Isoform  | <div>Matrix: DNAFULL<br/>Gap open penalty: 10.0<br/>Gap extend penalty: 1.0</div> <div>Length: 139<br/>Identity: 129 / 139 ( 92.81% )<br/>Gaps: 1 / 139 ( 0.72% )</div>  |
|                |           |                  | MUC4-6 - SW620 Amplicon Reverse<br>MUC4-6 Isoform  |                                                                                                                                                                          |
|                |           |                  | MUC4-6 - SW620 Amplicon Reverse<br>MUC4-6 Isoform  |                                                                                                                                                                          |

B

| Gene Name      | Cell Line | Amplicon size bp | alignment                                          |                                                                                                                                                                                                                                                                                                                                                                                                     | Gaps                                                                                                                                                   |  |
|----------------|-----------|------------------|----------------------------------------------------|-----------------------------------------------------------------------------------------------------------------------------------------------------------------------------------------------------------------------------------------------------------------------------------------------------------------------------------------------------------------------------------------------------|--------------------------------------------------------------------------------------------------------------------------------------------------------|--|
| MUC4-1 Forward | CCD841    | 282bp            | MUC4-1 - CCD841 Amplicon Forward<br>MUC4-1 Isoform | 1 ACACCTTACTGAGCATCCACAGGACACGCCACCTCTCTTCTGTCAACCGACACTTCTCTCAGTTCACACAGGTGACGCCACCCCTCTTCTGTCAACCGACAC 3489<br>3390 ACACCTTCTCTGAGCATCCACAGGTACGCCACCTCTCTTCTGTCAACCGACACTTCTCTCAGTTCACACAGGTGACGCCACCCCTCTTCTGTCAACCGACAC 3489<br>3390 3400 3410 3420 3430 3440 3450 3460 3470 3480                                                                                                              | Matrix: DNAFULL<br>Gap open penalty: 10.0<br>Gap extend penalty: 1.0<br><br>Length: 166<br>Identity: 158 / 166 ( 95.18 % )<br>Gaps: 0 / 166 ( 0.00 % ) |  |
|                |           |                  | MUC4-1 - CCD841 Amplicon Forward<br>MUC4-1 Isoform | 101 TTCTCTCAGCATCCACAGGTACGCCACCTCTCTTCTGTCAACCGACACTTCTCTCAGTATGACAGG 166<br>3490 TTCTCTCAGCATCCACAGGTACGCCACCTCTCTTCTGTCAACCGACACTTCTCTCAGTATGACAGG 3555<br>3490 3500 3510 3520 3530 3540 3550                                                                                                                                                                                                    |                                                                                                                                                        |  |
| MUC4-1 Forward | CCD841    | 240bp            | MUC4-1 - CCD841 Amplicon Forward<br>MUC4-1 Isoform | 1 TCTTTCTGTGA-CGACACTTTCCTCAGTATCCACAGGTACGCCACCTCTCTTCTGTCAACCGACCTTCTCTCAGTGTCCACAGGTGACGCCACCCCTCTT 99<br>5968 TCTTTCTGTGTCAACCGACTTCTCTCAGTATCCACAGGTACGCCACCTCTCTTCTGTCAACCGACCTTCTCTCAGTGTCCACAGGTGACGCCACCCCTCTT 6067<br>5970 5980 5990 6000 6010 6020 6030 6040 6050 6060                                                                                                                   | Matrix: DNAFULL<br>Gap open penalty: 10.0<br>Gap extend penalty: 1.0<br><br>Length: 197<br>Identity: 191 / 197 ( 96.95% )<br>Gaps: 1 / 197 ( 0.51 % )  |  |
|                |           |                  | MUC4-1 - CCD841 Amplicon Forward<br>MUC4-1 Isoform | 100 CCTGTCAACCGACACTTCTCTCAGTGTCCACAGGTACGCCACCTCTTCCGTGTCAACCGACACTTCTCTCAGTATGTACAGGACAATGCCACCCCTCTTCT 196<br>6068 CCTGTCAACCGACCTTCTCTCAGTGTCCACAGGTACGCCACCTCTTCCGTGTCAACCGACACTTCTCTCAGTATGTACAGGACAATGCCACCCCTCTTCT 6164<br>6070 6080 6090 6100 6110 6120 6130 6140 6150 6160                                                                                                                |                                                                                                                                                        |  |
| MUC4-1 Reverse | CCD841    | 240bp            | MUC4-1 - CCD841 Amplicon Reverse<br>MUC4-1 Isoform | 1 TCTCTCAGTGTCCACAGGTGACGCCACCTCTCTTCTGTGTACCGACACTTCTCTCAGGTTCACAGGTGACGCCACCTCTCTTCTGTGTACCGACACTTCTCT 100<br>6563 TCTCTCAGTGTCCACAGGTGACGCCACCTCTCTTCTGTGTACCGACACTTCTCTCAGGTTCACAGGTGACGCCACCTCTCTTCTGTGTACCGACACTTCTCT 6662<br>6570 6580 6590 6600 6610 6620 6630 6640 6650 6660                                                                                                               | Matrix: DNAFULL<br>Gap open penalty: 10.0<br>Gap extend penalty: 1.0<br><br>Length: 186<br>Identity: 171 / 186 ( 91.94% )<br>Gaps: 0 / 186 ( 0.00% )   |  |
|                |           |                  | MUC4-1 - CCD841 Amplicon Reverse<br>MUC4-1 Isoform | 101 CAGCATCCACAGGTGATGCCACCCCTCTTCTGTGTCAACCGACACTTCTCTCAGGTATCCACAGGTGACGCCACCTCTTCTGTGTACCG 186<br>6663 CAGCATCCACAGGTGACGCCACCCCTCTTCTGTGTCAACCGACACTTCTCTCAGGTATCCACAGGTGACGCCACCTCTTCTGTGTACCG 6748<br>6670 6680 6690 6700 6710 6720 6730 6740                                                                                                                                                 |                                                                                                                                                        |  |
| MUC4-1 Forward | SW480     | 240bp            | MUC4-1 - SW480 Amplicon Forward<br>MUC4-1 Isoform  | 1 TCTTCTGTGTGA-CGACACTTTCCTCAGTATCCACAGGTACGCCACCTCTCTTCTGTGTACCGACCTTCTCTCAGTGTCCACAGGTGACGCCACCCCTCTT 99<br>5968 TCTTCTGTGTGAACCGACTTCTCTCAGTATCCACAGGTACGCCACCTCTCTTCTGTGTACCGACCTTCTCTCAGTGTCCACAGGTGACGCCACCCCTCTT 6067<br>5970 5980 5990 6000 6010 6020 6030 6040 6050 6060                                                                                                                   | Matrix: DNAFULL<br>Gap open penalty: 10.0<br>Gap extend penalty: 1.0<br><br>Length: 197<br>Identity: 191 / 197 ( 96.95% )<br>Gaps: 1 / 197 ( 0.51 % )  |  |
|                |           |                  | MUC4-1 - SW480 Amplicon Forward<br>MUC4-1 Isoform  | 100 CCTGTCAACCGACACTTCTCTCAGTGTCCACAGGTACGCCACCCCTCTTCTGTGTCAACCGACACTTCTCTCAGTATGTACAGGACAATGCCACCCCTCTTCT 196<br>6068 CCTGTCAACCGACCTTCTCTCAGTGTCCACAGGTACGCCACCCCTCTTCTGTGTCAACCGACACTTCTCTCAGTATGTACAGGACAATGCCACCCCTCTTCT 6164<br>6070 6080 6090 6100 6110 6120 6130 6140 6150 6160                                                                                                            |                                                                                                                                                        |  |
| MUC4-1 Forward | SW480     | 282bp            | MUC4-1 - SW480 Amplicon Forward<br>MUC4-1 Isoform  | 1 TCCACAGGTGACGCCACCCCTCTTCTGTGTACCGACACTTCTCTCAGTATCCACAGGTGATGCCACCTCTCTTCTGTGTCAACCGACACTTCTCTCAGTATCCA 100<br>3356 TCCACAGGTGACGCCACCCCTCTTCTGTGTACCGACACTTCTCTCAGTATCCACAGGTGATGCCACCTCTCTTCTGTGTCAACCGACACTTCTCTCAGTATCCA 3455<br>3360 3370 3380 3390 3400 3410 3420 3430 3440 3450                                                                                                           | Matrix: DNAFULL<br>Gap open penalty: 10.0<br>Gap extend penalty: 1.0<br><br>Length: 221<br>Identity: 206 / 221 ( 93.21 % )<br>Gaps: 0 / 221 ( 0.00% )  |  |
|                |           |                  | MUC4-1 - SW480 Amplicon Forward<br>MUC4-1 Isoform  | 101 CAGGACATGCCACCCCTCTTCAATGTCAACCGACACTTCTCTCAGTATCCACAGGTGATGCCACCTCTCTTCTGTGTCAACCGACACTTCTCTCAGTATCCA 200<br>3456 CAGGTGACGCCACCCCTCTTCTGTGTCAACCGACACTTCTCTCAGTATCCACAGGTGATGCCACCTCTCTTCTGTGTCAACCGACACTTCTCTCAGTATCCA 3555<br>3460 3470 3480 3490 3500 3510 3520 3530 3540 3550                                                                                                             |                                                                                                                                                        |  |
| MUC4-1 Forward | SW480     | 282bp            | MUC4-1 - SW480 Amplicon Forward<br>MUC4-1 Isoform  | 201 ACACACACCCCTCTTCTATGT 221<br>3556 TACACACCCCTCTTCTATGT 3576<br>3560 3570                                                                                                                                                                                                                                                                                                                        |                                                                                                                                                        |  |
|                |           |                  |                                                    |                                                                                                                                                                                                                                                                                                                                                                                                     |                                                                                                                                                        |  |
| MUC4-1 Reverse | SW620     | 282bp            | MUC4-1 - SW620 Amplicon Forward<br>MUC4-1 Isoform  | 1 TTCTCTCAGATCCACAGGTGACGCCACCCCTCTTCTGTGTACCGACACTTCTCTCAGTATCCACAGGTGACGCCACCTCTCTTCTGTGTACCGACACTTCT 100<br>8914 TTCTCTCAGATCCACAGGTGACGCCACCCCTCTTCTGTGTACCGACACTTCTCTCAGTATCCACAGGTGACGCCACCTCTCTTCTGTGTACCGACACTTCT 9013<br>8920 8930 8940 8950 8960 8970 8980 8990 9000 9010                                                                                                                 | Matrix: DNAFULL<br>Gap open penalty: 10.0<br>Gap extend penalty: 1.0<br><br>Length: 379<br>Identity: 354 / 379 ( 93.40% )<br>Gaps: 0 / 379 ( 0.00% )   |  |
|                |           |                  | MUC4-1 - SW620 Amplicon Forward<br>MUC4-1 Isoform  | 101 TCAGCATCCACAGGTGACGCCACCCCTCTTCTGTGTCAACCGACACTTCTCTCAGTATCCACAGGTGATGCCACCCCTCTTCTGTGTCAACCGACACTTCTCTCAG 200<br>9014 TCAGCATCCACAGGTGACGCCACCCCTCTTCTGTGTCAACCGACACTTCTCTCAGTATCCACAGGTGATGCCACCCCTCTTCTGTGTCAACCGACACTTCTCTCAG 9113<br>9020 9030 9040 9050 9060 9070 9080 9090 9100 9110                                                                                                     |                                                                                                                                                        |  |
| MUC4-1 Reverse | SW620     | 282bp            | MUC4-1 - SW620 Amplicon Forward<br>MUC4-1 Isoform  | 201 CATCCACAGGACATGCCACCCCTCTTCTGTGTCAACCGACACTTCTCTCAGTATCCACAGGTGATGCCACCCCTCTTCTGTGTCAACCGACACTTCTCTCAGCATC 300<br>9114 CATCCATAGGTGACGCCACCTCTTCTGTGTCAACCGACACTTCTCTCAGTATCCACAGGTGATGCCACCCCTCTTCTGTGTCAACCGACACTTCTCTCAGCATC 9213<br>9120 9130 9140 9150 9160 9170 9180 9190 9200 9210                                                                                                       |                                                                                                                                                        |  |
|                |           |                  | MUC4-1 - SW620 Amplicon Forward<br>MUC4-1 Isoform  | 301 CACAGGTGACGCCACCCCTCTTCTGTGTCAACCGACACTTCTCTCAGTATCCACAGGTGATGCCACCCCTCTTCTGTGTCAACCGACACTTCTCTCAGCATC 379<br>9214 CACGGTCAACCGACCCCTCTTCTGTGTCAACCGACACTTCTCTCAGTATCCACAGGTGATGCCACCCCTCTTCTGTGTCAACCGACACTTCTCTCAGCATC 9292<br>9220 9230 9240 9250 9260 9270 9280 9290                                                                                                                        |                                                                                                                                                        |  |
| MUC4-1 Reverse | SW620     | 282bp            | MUC4-1 - SW620 Amplicon Reverse<br>MUC4-1 Isoform  | 1 CACCACCTCTTCTGTGTGTGACCATCTCCTCTCTCAGTATCCACAGGTGACGCCACCCCTCTTCTGTGTGACCATCTCCTCTCTCAGTATCCACAGGTGACGCCAC 100<br>8839 CACCACCTCTTCTGTGTGTGACCATCTCCTCTCTCAGTATCCACAGGTGACGCCACCCCTCTTCTGTGTGACCATCTCCTCTCTCAGTATCCACAGGTGACGCCAC 8938<br>8840 8850 8860 8870 8880 8890 8900 8910 8920 8930                                                                                                       | Matrix: DNAFULL<br>Gap open penalty: 10.0<br>Gap extend penalty: 1.0<br><br>Length: 268<br>Identity: 249 / 268 ( 92.91 % )<br>Gaps: 1 / 268 ( 0.37 % ) |  |
|                |           |                  | MUC4-1 - SW620 Amplicon Reverse<br>MUC4-1 Isoform  | 101 ACCCTCTTCTGTGTGACCAACCTTCTCTCAGTATCCACAGGTGACGCCACCTCTTCTGTGTGACCAACCTTCTCTCAGTATCCACAGGTGACGCCACCC 200<br>8939 ACCCTCTTCTGTGTGACCAACCTTCTCTCAGTATCCACAGGTGACGCCACCTCTTCTGTGTGACCAACCTTCTCTCAGTATCCACAGGTGACGCCACCC 9038<br>8940 8950 8960 8970 8980 8990 9000 9010 9020 9030                                                                                                                   |                                                                                                                                                        |  |
| MUC4-1 Reverse | SW620     | 240bp            | MUC4-1 - SW620 Amplicon Reverse<br>MUC4-1 Isoform  | 201 CTCTTCTGTGTGACCAACCTTCTCTCAGTATCCACAGGTGACGCCACCTCTCTCTGTGTGTGACCAACCTTCTCTCAGTATCCACAGGTGACGCCACCTCTCTCTGTGTGACCAACCT 267<br>9039 CTCTTCTGTGTGACCAACCTTCTCTCAGTATCCACAGGTGACGCCACCTCTCTCTGTGTGTGACCAACCTTCTCTCAGTATCCACAGGTGACGCCACCTCTCTCTGTGTGACCAACCT 9106<br>9040 9050 9060 9070 9080 9090 9100                                                                                            | Matrix: DNAFULL<br>Gap open penalty: 10.0<br>Gap extend penalty: 1.0<br><br>Length: 198<br>Identity: 190 / 198 ( 95.96% )<br>Gaps: 2 / 198 ( 1.01 % )  |  |
|                |           |                  | MUC4-1 - SW620 Amplicon Reverse<br>MUC4-1 Isoform  | 1 CCATCCCTTCTCTCAGTATCCACAGGTGACACCATGCTCTTCTGTGTGTGACCAACCTTCTCTCAGTATCCACAGGTGACGCCACCCCTCTCTGTGTGTGACCAACCT 100<br>11,643 CCATCCCTTCTCTCAGTATCCACAGGTGACACCATGCTCTTCTGTGTGTGACCAACCTTCTCTCAGTATCCACAGGTGACGCCACCCCTCTCTGTGTGTGACCAACCT 11,742<br>11650 11670 11680 11690 11700 11710 11720 11730 11740                                                                                           |                                                                                                                                                        |  |
| MUC4-1 Reverse | SW620     | 240bp            | MUC4-1 - SW620 Amplicon Reverse<br>MUC4-1 Isoform  | 101 CTTTCTCTCAGTATCCACAGGTGACACCCCTCTTCTGTGTGACCAACCTTCTCTCAGTATCCACAGGTGACGCCACCCCTCTCTCTGTGTGACCAACCTTCTCTCAGTATCCACAGGTGACGCCACCCCTCTCTCTGTGTGACCAACCT 196<br>11,743 CTTTCTCTCAGTATCCACAGGTGACACCCCTCTTCTGTGTGACCAACCTTCTCTCAGTATCCACAGGTGACGCCACCCCTCTCTCTGTGTGACCAACCTTCTCTCAGTATCCACAGGTGACGCCACCCCTCTCTCTGTGTGACCAACCT 11,840<br>11750 11760 11770 11780 11790 11800 11810 11820 11830 11840 |                                                                                                                                                        |  |
|                |           |                  |                                                    |                                                                                                                                                                                                                                                                                                                                                                                                     |                                                                                                                                                        |  |
