# Supplementary material for: Characterization of Alternatively Spliced Isoforms of MUC4 and ADAM12 Genes in a Metastatic Colorectal Cancer Cell Line Model
Source: Preprints.org preprint supplement (doi:10.20944/preprints202106.0102.v1), 2021-06-03
Supplement: Supplementary file 8 [file supplementary]

A

| Gene Name        | Cell Line | Amplicon size bp | alignment                                               |                                                                                                                                                                                                                                           | Gaps                                                                      |
|------------------|-----------|------------------|---------------------------------------------------------|-------------------------------------------------------------------------------------------------------------------------------------------------------------------------------------------------------------------------------------------|---------------------------------------------------------------------------|
| MUC4-All Forward | CCD841    | 210bp            | MUC4-All - CCD841 Amplicon Forward<br>MUC4-All Isoforms | 1 10 20 30 40 50 60 70 80<br>16,040 CTGGTCTA-AGCCCCAGAGCGGCTTACCTGCGTGTCCTCAAGTGCAGTAGGGGCTACTGTGACCATGGAGGCCAGTGCCAGCACCTGCC 89 16,128<br>16040 CTGGTCTACAGCCCCAGAGCGGCTTACCTGCGTGTCCTC-GTGCAGTAGGGGCTACTGTGACCATGGAGGCCAGTGCCAGCACCTGCC | Matrix: DNAFULL<br>Gap open penalty: 10.0<br>Gap extend penalty: 1.0      |
|                  |           |                  | MUC4-All - CCD841 Amplicon Forward<br>MUC4-All Isoforms | 90 100 110 120 130 140 150 160 170<br>16,129 CAGTGGGCCCCGCTGCAGCTGTGTGTCCTTCTCCATCTACACGGCTGGGGCGAGCACTGTGAGCACCTGAGCATGAAACTCGAC 174 16,213<br>16130 16140 16150 16160 16170 16180 16190 16200 16210                                     | Length: 175<br>Identity: 173 / 175 ( 98.86% )<br>Gaps: 2 / 175 ( 1.14% )  |
| MUC4-All Reverse | CCD841    | 210bp            | MUC4-All - CCD841 Amplicon Reverse<br>MUC4-All Isoforms | 1 10 20 30 40 50 60 70 80 90 100<br>16,004 GCTTACTTCAGATGCGATGGCTACAAGGGCTACGACCTGGTCTACAGCCCCAGAGCGGCTTACCTGCGTGTCCTCAAGTGCAGTAGGGGCTACTGTGACC 100 16,103<br>16010 16020 16030 16040 16050 16060 16070 16080 16090 16100                 | Matrix: DNAFULL<br>Gap open penalty: 10.0<br>Gap extend penalty: 1.0      |
|                  |           |                  | MUC4-All - CCD841 Amplicon Reverse<br>MUC4-All Isoforms | 101 110 120 130 140 150 160 170<br>16,104 ATGGAGGCCAGTGCCAGCACCTGCCAGTGGGCCCCGCTGCAGCTGTGTGTCCTTCTCCATCTACACGGCT 172 16,175<br>16110 16120 16130 16140 16150 16160 16170                                                                  | Length: 172<br>Identity: 171 / 172 ( 99.42% )<br>Gaps: 0 / 172 ( 0.00% )  |
| MUC4-All Forward | SW480     | 210bp            | MUC4-All - SW480 Amplicon Forward<br>MUC4-All Isoforms  | 1 10 20 30 40 50 60 70 80 90<br>16,052 CCCCAGAGCGGCTTACCTGCGTGTCCTCCGTCAGTAGGGGCTACTGTGACCATGGAGGCCAGTGCCAGCACCTGCCAGTGGGCCCCGC 90 16,141<br>16060 16070 16080 16090 16100 16110 16120 16130 16140                                        | Matrix: DNAFULL<br>Gap open penalty: 10.0<br>Gap extend penalty: 1.0      |
|                  |           |                  | MUC4-All - SW480 Amplicon Forward<br>MUC4-All Isoforms  | 91 100 110 120 130 140 150 160<br>16,142 TGCAGCTGTGTGTCCTTCTCCATCTACACGGCTGGGGCGAGCACTGTGAGCACCTGAGCATGAAACTCGAC 162 16,213<br>16150 16160 16170 16180 16190 16200 16210                                                                  | Length: 162<br>Identity: 162 / 162 ( 100.00% )<br>Gaps: 0 / 162 ( 0.00% ) |
| MUC4-All Reverse | SW480     | 210bp            | MUC4-All - SW480 Amplicon Reverse<br>MUC4-All Isoforms  | 1 10 20 30 40 50 60 70 80 90 100<br>16,004 GCTTACTTCAGATGCGATGGCTACAAGGGCTACGACCTGGTCTACAGCCCCAGAGCGGCTTACCTGCGTGTCCTCCGTCAGTAGGGGCTACTGTGACC 100 16,103<br>16010 16020 16030 16040 16050 16060 16070 16080 16090 16100                   | Matrix: DNAFULL<br>Gap open penalty: 10.0<br>Gap extend penalty: 1.0      |
|                  |           |                  | MUC4-All - SW480 Amplicon Reverse<br>MUC4-All Isoforms  | 101 110 120 130 140 150 160 170<br>16,104 ATGGAGGCCAGTGCCAGCACCTGCCAGTGGGCCCCGCTGCAGCTGTGTGTCCTTCTCCATCTACACGGCT 172 16,175<br>16110 16120 16130 16140 16150 16160 16170                                                                  | Length: 172<br>Identity: 172 / 172 ( 100.00% )<br>Gaps: 0 / 172 ( 0.00% ) |
| MUC4-All Forward | SW620     | 210bp            | MUC4-All - SW620 Amplicon Forward<br>MUC4-All Isoforms  | 1 10 20 30 40 50 60 70 80 90 100<br>16,051 CCCCAGAGCGGCTTACCTGCGTGTCCTCCGTCAGTAGGGGCTACTGTGACCATGGAGGCCAGTGCCAGCACCTGCCAGTGGGCCCCGCTGCAGCTGT 100 16,150<br>16060 16070 16080 16090 16100 16110 16120 16130 16140 16150                    | Matrix: DNAFULL<br>Gap open penalty: 10.0<br>Gap extend penalty: 1.0      |
|                  |           |                  | MUC4-All - SW620 Amplicon Forward<br>MUC4-All Isoforms  | 101 110 120 130 140 150 160<br>16,151 GTGTCTTCTCCATCTACACGGCTGGGGCGAGCACTGTGAGCACCTGAGCATGAAACTCGAC 163 16,213<br>16160 16170 16180 16190 16200 16210                                                                                     | Length: 163<br>Identity: 163 / 163 ( 100.00% )<br>Gaps: 0 / 163 ( 0.00% ) |
| MUC4-All Reverse | SW620     | 210bp            | MUC4-All - SW620 Amplicon Reverse<br>MUC4-All Isoforms  | 1 10 20 30 40 50 60 70 80 90 100<br>16,004 GCTTACTTCAGATGCGATGGCTACAAGGGCTACGACCTGGTCTACAGCCCCAGAGCGGCTTACCTGCGTGTCCTCCGTCAGTAGGGGCTACTGTGACC 100 16,103<br>16010 16020 16030 16040 16050 16060 16070 16080 16090 16100                   | Matrix: DNAFULL<br>Gap open penalty: 10.0<br>Gap extend penalty: 1.0      |
|                  |           |                  | MUC4-All - SW620 Amplicon Reverse<br>MUC4-All Isoforms  | 101 110 120 130 140 150 160 170<br>16,104 ATGGAGGCCAGTGCCAGCACCTGCCAGTGGGCCCCGCTGCAGCTGTGTGTCCTTCTCCATCTACA-CCGCTGG 175 16,177<br>16110 16120 16130 16140 16150 16160 16170                                                               | Length: 175<br>Identity: 174 / 175 ( 99.43% )<br>Gaps: 1 / 175 ( 0.57% )  |

B

| Gene Name       | Cell Line | Amplicon size bp | alignment                                             |                                                                                                                                                                                                                                                                                                                                                                                                                                                                                                                                                                                                                            | Gaps                                                                     |  |
|-----------------|-----------|------------------|-------------------------------------------------------|----------------------------------------------------------------------------------------------------------------------------------------------------------------------------------------------------------------------------------------------------------------------------------------------------------------------------------------------------------------------------------------------------------------------------------------------------------------------------------------------------------------------------------------------------------------------------------------------------------------------------|--------------------------------------------------------------------------|--|
| MUC4-16 Forward | CCD841    | 223bp            | MUC4-16 - CCD841 Amplicon Forward<br>MUC4-16 Isoforms | 1                   10                   20                   30                   40                   50                   60                   70                   80                   90                   100<br>1880 ATAAAAACGGCCACATCCCCATCTTCTTCACCTATGCTGGATAGACACACATCAACAACAAATTACAACGGGCACCATCAACAAATCATTCAACAATACATT 1979<br>1880                   1890                   1900                   1910                   1920                   1930                   1940                   1950                   1960                   1970                                                            | Matrix: DNAFULL<br>Gap open penalty: 10.0<br>Gap extend penalty: 1.0     |  |
|                 |           |                  | MUC4-16 - CCD841 Amplicon Forward<br>MUC4-16 Isoforms | 101                   110                   120                   130                   140                   150                   160                   170<br>1980 CCACAAGCACCTCTCCTCAGGAATCACCAGCTGTTTCCCAAAGGGGTACACTCAAGCCCCGCAGACCACACAAGAATC 179<br>1980                   1990                   2000                   2010                   2020                   2030                   2040                   2050<br>1980 CCACAAGCACCTCTCCTCAGGAATCACCAGCTGTTTCCCAAAGGGGTACACTCAAGCCCCGCAGACCACACAAGAATC 2058                                                                                              | Length: 179<br>Identity: 178 / 179 ( 99.44% )<br>Gaps: 0 / 179 ( 0.00% ) |  |
| MUC4-16 Reverse | CCD841    | 223bp            | MUC4-16 - CCD841 Amplicon Reverse<br>MUC4-16 Isoforms | 1                   10                   20                   30                   40                   50                   60                   70                   80                   90                   100<br>1834 TGGAGAGGCTCTTCTCAGCAGCCCAAGCTACAGTGTGACTCAGATGATAAAAAACGGCCACATCCCCATCTTCTTCACCTATGCTGGATAGACACACATCA 100<br>1840                   1850                   1860                   1870                   1880                   1890                   1900                   1910                   1920                   1930                                                              | Matrix: DNAFULL<br>Gap open penalty: 10.0<br>Gap extend penalty: 1.0     |  |
|                 |           |                  | MUC4-16 - CCD841 Amplicon Reverse<br>MUC4-16 Isoforms | 101                   110                   120                   130                   140                   150                   160                   170<br>1934 CAACAAATTACAACGGCACCATTCAACAAATCATTTCAACAATACATTTCCACAAGCACCTCTCCTCAGGAATCACCAGCTG 179<br>1940                   1950                   1960                   1970                   1980                   1990                   2000                   2010<br>1934 CAACAAATTACAACGGCACCATTCAACAAATCATTTCAACAATACATTTCCACAAGCACCTCTCCTCAGGAATCACCAGCTG 2012                                                                                      | Length: 179<br>Identity: 178 / 179 ( 99.44% )<br>Gaps: 0 / 179 ( 0.00% ) |  |
| MUC4-16 Forward | SW480     | 223bp            | MUC4-16 - SW480 Amplicon Forward<br>MUC4-16 Isoforms  | 1                   10                   20                   30                   40                   50                   60                   70                   80                   90                   100<br>1883 AAAACGGCCACATCCCCATCTTCTTCACCTATGCTGGATAGACACACATCAACAACAAATTACAACGGGCACCATCAACAAATCATTCAACAATACATTCCA 100<br>1890                   1900                   1910                   1920                   1930                   1940                   1950                   1960                   1970                   1980                                                             | Matrix: DNAFULL<br>Gap open penalty: 10.0<br>Gap extend penalty: 1.0     |  |
|                 |           |                  | MUC4-16 - SW480 Amplicon Forward<br>MUC4-16 Isoforms  | 101                   110                   120                   130                   140                   150                   160                   170<br>1983 CAAGCACCTCTCCTCAGGAATCACCAGCTGTTTCCCAAAGGGGTACACTCAAGCCCCGCAGACCACACAAGAAT 175<br>1990                   2000                   2010                   2020                   2030                   2040                   2050<br>1983 CAAGCACCTCTCCTCAGGAATCACCAGCTGTTTCCCAAAGGGGTACACTCAAGCCCCGCAGACCACACAAGAAT 2057                                                                                                                             | Length: 175<br>Identity: 174 / 175 ( 99.43% )<br>Gaps: 0 / 175 ( 0.00% ) |  |
| MUC4-16 Reverse | SW480     | 223bp            | MUC4-16 - SW480 Amplicon Reverse<br>MUC4-16 Isoforms  | 1                   10                   20                   30                   40                   50                   60                   70                   80                   90                   100<br>1834 TGGAGAGGCTCTTCTCAGCAGCCCAAGCTACAGTGTGACTCAGATGATAAAAAACGGCCACATCCCCATCTTCTTCACCTATGCTGGATAGACACACATCA 100<br>1840                   1850                   1860                   1870                   1880                   1890                   1900                   1910                   1920                   1930                                                              | Matrix: DNAFULL<br>Gap open penalty: 10.0<br>Gap extend penalty: 1.0     |  |
|                 |           |                  | MUC4-16 - SW480 Amplicon Reverse<br>MUC4-16 Isoforms  | 101                   110                   120                   130                   140                   150                   160                   170<br>1934 CAACAAATTACAACGGCACCATTCAACAAATCATTTCAACAATACATTTCCACAAGCACCTCTCCTCAGG 167<br>1940                   1950                   1960                   1970                   1980                   1990                   2000<br>1934 CAACAAATTACAACGGCACCATTCAACAAATCATTTCAACAATACATTTCCACAAGCACCTCTCCTCAGG 2000                                                                                                                                     | Length: 167<br>Identity: 166 / 167 ( 99.40% )<br>Gaps: 0 / 167 ( 0.00% ) |  |
| MUC4-16 Forward | SW620     | 223bp            | MUC4-16 - SW620 Amplicon Forward<br>MUC4-16 Isoforms  | 9                   10                   20                   30                   40                   50                   60                   70                   80                   90                   100<br>1869 TGACTCAGATGATAAAAAACGGCCACATCCCCATCTTCTTCACCTATGCTGGATAGACACACATCAACAACAAATTACAACGGGCACCATCAACAAATCATTC 108<br>1870                   1880                   1890                   1900                   1910                   1920                   1930                   1940                   1950                   1960                                                            | Matrix: DNAFULL<br>Gap open penalty: 10.0<br>Gap extend penalty: 1.0     |  |
|                 |           |                  | MUC4-16 - SW620 Amplicon Forward<br>MUC4-16 Isoforms  | 109                   110                   120                   130                   140                   150                   160                   170                   180                   190<br>1969 CAAATCATTTCAACAATACATTTCCACAAGCACCTCTCCTCAGGAATCACCAGCTGTTTCCCAAAGGGGTACACTCAAGCCCCGCAGACCA 198<br>1970                   1980                   1990                   2000                   2010                   2020                   2030                   2040                   2050<br>1969 CAAATCATTTCAACAATACATTTCCACAAGCACCTCTCCTCAGGAATCACCAGCTGTTTCCCAAAGGGGTACACTCAAGCCCCGCAGACCA 2058 | Length: 190<br>Identity: 189 / 190 ( 99.47% )<br>Gaps: 0 / 190 ( 0.00% ) |  |
| MUC4-16 Reverse | SW620     | 223bp            | MUC4-16 - SW620 Amplicon Reverse<br>MUC4-16 Isoforms  | 1                   10                   20                   30                   40                   50                   60                   70                   80                   90                   100<br>1834 TGGAGAGGCTCTTCTCAGCAGCCCAAGCTACAGTGTGACTCAGATGATAAAAAACGGCCACATCCCCATCTTCTTCACCTATGCTGGATAGACACACATCA 100<br>1840                   1850                   1860                   1870                   1880                   1890                   1900                   1910                   1920                   1930                                                              | Matrix: DNAFULL<br>Gap open penalty: 10.0<br>Gap extend penalty: 1.0     |  |
|                 |           |                  | MUC4-16 - SW620 Amplicon Reverse<br>MUC4-16 Isoforms  | 101                   110                   120                   130                   140                   150                   160                   170<br>1934 CAACAAATTACAACGGCACCATTCAACAAATCATTTCAACAATACATTTCCACAAGCACCTCTCCTCAGGAATCACCAGCTG 179<br>1940                   1950                   1960                   1970                   1980                   1990                   2000                   2010<br>1934 CAACAAATTACAACGGCACCATTCAACAAATCATTTCAACAATACATTTCCACAAGCACCTCTCCTCAGGAATCACCAGCTG 2012                                                                                      | Length: 179<br>Identity: 178 / 179 ( 99.44% )<br>Gaps: 0 / 179 ( 0.00% ) |  |

C

| Gene Name      | Cell Line | Amplicon size bp | alignment                        |                                                                                                                                                                                                                                                                 | Gaps                                                                      |  |
|----------------|-----------|------------------|----------------------------------|-----------------------------------------------------------------------------------------------------------------------------------------------------------------------------------------------------------------------------------------------------------------|---------------------------------------------------------------------------|--|
| MUC4-4 Forward | CCD841    | 158bp            | MUC4-4 - CCD841 Amplicon Forward | 1 10 20 30 40 50 60 70 80 87<br>TGAAGGGGGCACTGGACGTGGGTCCCTGGGTGTCCCTGAGCTGCCTGTGTCTCTGCCCTCCGCAATGTGGTCCCAGGAATCA 200<br>114 TGAAGGGGGCACTGGAGGAGGGTCCCTGGGTGTCCCTGAGCTGCCTGTGTCTCTGCCCTCCGCAATGTGGTCCCAGGAATGA 200                                            | Matrix: DNAFULL<br>Gap open penalty: 10.0<br>Gap extend penalty: 1.0      |  |
|                |           |                  | MUC4-4 Isoform                   | 120 130 140 150 160 170 180 190 200                                                                                                                                                                                                                             | Length: 87<br>Identity: 83 / 87 ( 95.40% )<br>Gaps: 0 / 87 ( 0.00% )      |  |
| MUC4-4 Reverse | CCD841    | 158bp            | MUC4-4 - CCD841 Amplicon Reverse | 1 10 20 30 40 50 60 70 80 90 100<br>GTCTGCTCCTCACACTGCAAGCTGTGGGCCGTGGAAGCTTCCCTAGGGAGCCAGGGGGACTTTTGCCGCAGCCATGAAGGGGGGCACGCTGGAGGAGGGTCC 100<br>41 GTCTGCTCCTCACACTGCAAGCTGTGGGCCGTGGAAGCTTCCCTAGGGAGCCAGGGGGACTTTTGCCGCAGCCATGAAGGGGGGCACGCTGGAGGAGGGTCC 140 | Matrix: DNAFULL<br>Gap open penalty: 10.0<br>Gap extend penalty: 1.0      |  |
|                |           |                  | MUC4-4 Isoform                   | 110 120 123 141 150 160<br>101 CCTGGGTGTCCCTGAGCTGCC 123<br>141 CCTGGGTGTCCCTGAGCTGCC 163                                                                                                                                                                       | Length: 123<br>Identity: 122 / 123 ( 99.19% )<br>Gaps: 0 / 123 ( 0.00% )  |  |
| MUC4-4 Forward | SW480     | 158bp            | MUC4-4 - SW480 Amplicon Forward  | 1 10 20 30 40 50 60 70 80 90 100<br>CCCAGGGAGCCAGGGGGACTTTTGCCGCAGCCATGAAGGGGGGCACGCTGGAGGAGGGTCCCTGGGTGTCCCTGAGCTGCCTGTGTCTCTGCCCTCTTCC 100<br>81 CCCAGGGAGCCAGGGGGACTTTTGCCGCAGCCATGAAGGGGGGCACGCTGGAGGAGGGTCCCTGGGTGTCCCTGAGCTGCCTGTGTCTCTGCCCTCTTCC 180     | Matrix: DNAFULL<br>Gap open penalty: 10.0<br>Gap extend penalty: 1.0      |  |
|                |           |                  | MUC4-4 Isoform                   | 90 100 110 120 130 140 150 160 170 180<br>101 GCATGTGGTCCCAGGAAT 118<br>181 GCATGTGGTCCCAGGAAT 198                                                                                                                                                              | Length: 118<br>Identity: 118 / 118 ( 100.00% )<br>Gaps: 0 / 118 ( 0.00% ) |  |
| MUC4-4 Reverse | SW480     | 158bp            | MUC4-4 - SW480 Amplicon Reverse  | 1 10 20 30 40 50 60 70 80 90 100<br>GTCTGCTCCTCACACTGCAAGCTGTGGGCCGTGGAAGCTTCCCCAGGGAGCCAGGGGGACTTTTGCCGCAGCCATGAAGGGGGGCACGCTGGAGGAGGGTCC 100<br>41 GTCTGCTCCTCACACTGCAAGCTGTGGGCCGTGGAAGCTTCCCCAGGGAGCCAGGGGGACTTTTGCCGCAGCCATGAAGGGGGGCACGCTGGAGGAGGGTCC 140 | Matrix: DNAFULL<br>Gap open penalty: 10.0<br>Gap extend penalty: 1.0      |  |
|                |           |                  | MUC4-4 Isoform                   | 110 120 120 141 150 160<br>101 CCTGGGTGTCCCTGAGCTGC 120<br>141 CCTGGGTGTCCCTGAGCTGC 160                                                                                                                                                                         | Length: 120<br>Identity: 120 / 120 ( 100.00% )<br>Gaps: 0 / 120 ( 0.00% ) |  |
| MUC4-4 Forward | SW620     | 158bp            | MUC4-4 - SW620 Amplicon Forward  | 1 10 20 30 40 50 60 70 80 90 100<br>AGGGAGCCAGGGGGACTTTTGCCGCAGCCATGAAGGGGGGCACGCTGGAGGAGGGTCCCTGGGTGTCCCTGAGCTGCCTGTGTCTCTGCCCTCTTCCGCA 100<br>84 AGGGAGCCAGGGGGACTTTTGCCGCAGCCATGAAGGGGGGCACGCTGGAGGAGGGTCCCTGGGTGTCCCTGAGCTGCCTGTGTCTCTGCCCTCTTCCGCA 183     | Matrix: DNAFULL<br>Gap open penalty: 10.0<br>Gap extend penalty: 1.0      |  |
|                |           |                  | MUC4-4 Isoform                   | 90 100 110 120 130 140 150 160 170 180<br>101 TGTGGTCCCAGGAAT 115<br>184 TGTGGTCCCAGGAAT 198                                                                                                                                                                    | Length: 115<br>Identity: 115 / 115 ( 100.00% )<br>Gaps: 0 / 115 ( 0.00% ) |  |
| MUC4-4 Reverse | SW620     | 158bp            | MUC4-4 - SW620 Amplicon Reverse  | 1 10 20 30 40 50 60 70 80 90 100<br>GTCTGCTCCTCACACTGCAAGCTGTGGGCCGTGGAAGCTTCCCCAGGGAGCCAGGGGGACTTTTGCCGCAGCCATGAAGGGGGGCACGCTGGAGGAGGGTCC 100<br>41 GTCTGCTCCTCACACTGCAAGCTGTGGGCCGTGGAAGCTTCCCCAGGGAGCCAGGGGGACTTTTGCCGCAGCCATGAAGGGGGGCACGCTGGAGGAGGGTCC 140 | Matrix: DNAFULL<br>Gap open penalty: 10.0<br>Gap extend penalty: 1.0      |  |
|                |           |                  | MUC4-4 Isoform                   | 110 120 121 141 150 160<br>101 CCTGGGTGTCCCTGAGCTGCC 121<br>141 CCTGGGTGTCCCTGAGCTGCC 161                                                                                                                                                                       | Length: 121<br>Identity: 121 / 121 ( 100.00% )<br>Gaps: 0 / 121 ( 0.00% ) |  |
