# Supplementary figures and images for: Characterization of Alternatively Spliced Isoforms of MUC4 and ADAM12 Genes in a Metastatic Colorectal Cancer Cell Line Model
Source: Preprints.org preprint supplement (doi:10.20944/preprints202106.0102.v1), 2021-06-03

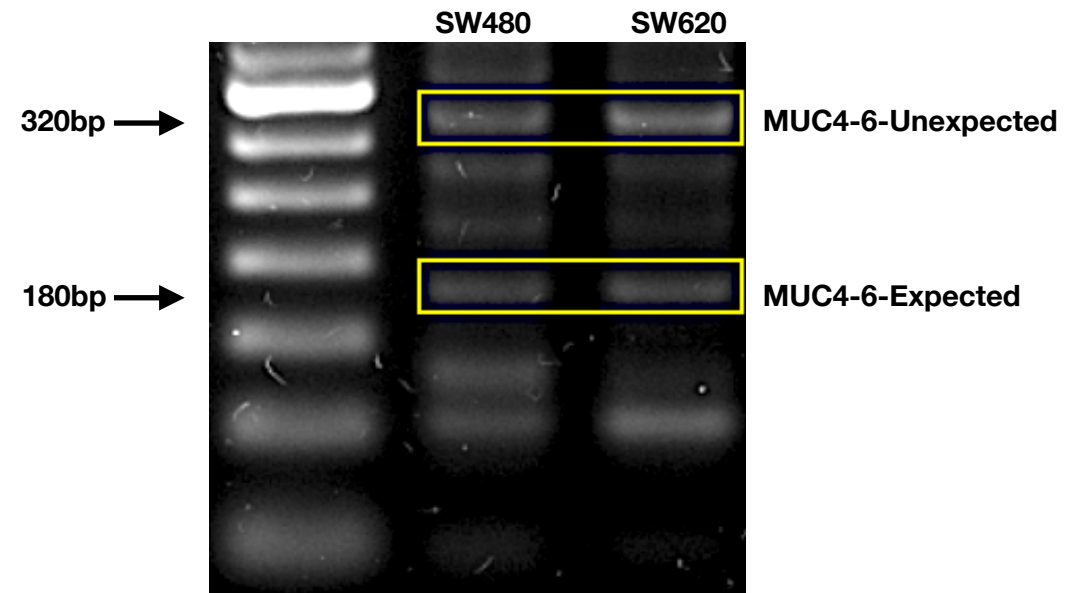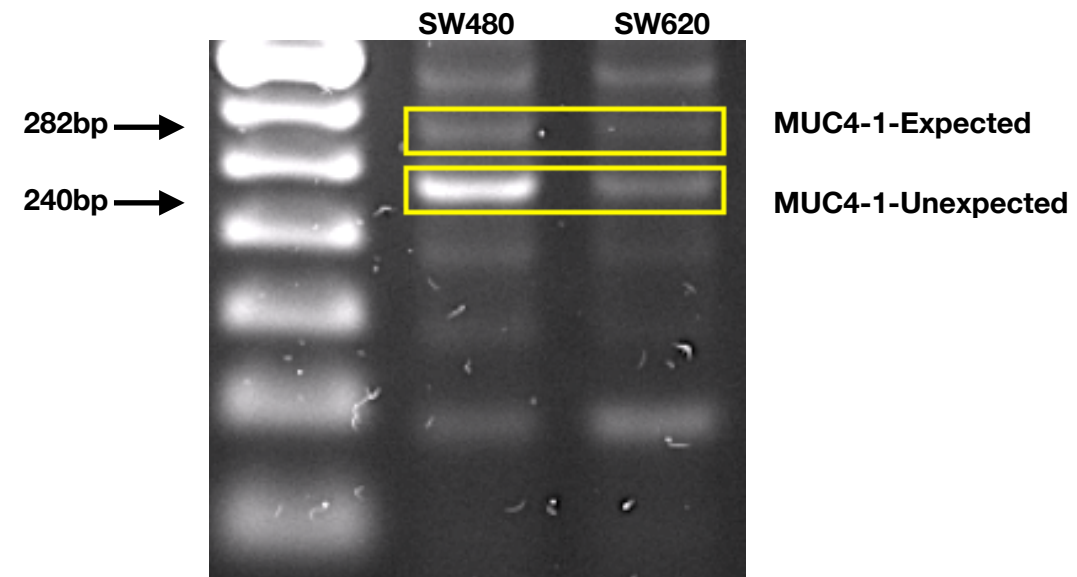

Supplement: Supplementary file 4 [file supplementary]
